# Supplementary material
Source: Springer Nature journal article supplement (https://www.springermedizin.de/resource/supplementary/12884_2014_1224_MOESM1_ESM.pdf/9459208)

Provider Attitudes to Planned Home Birth Scale - M

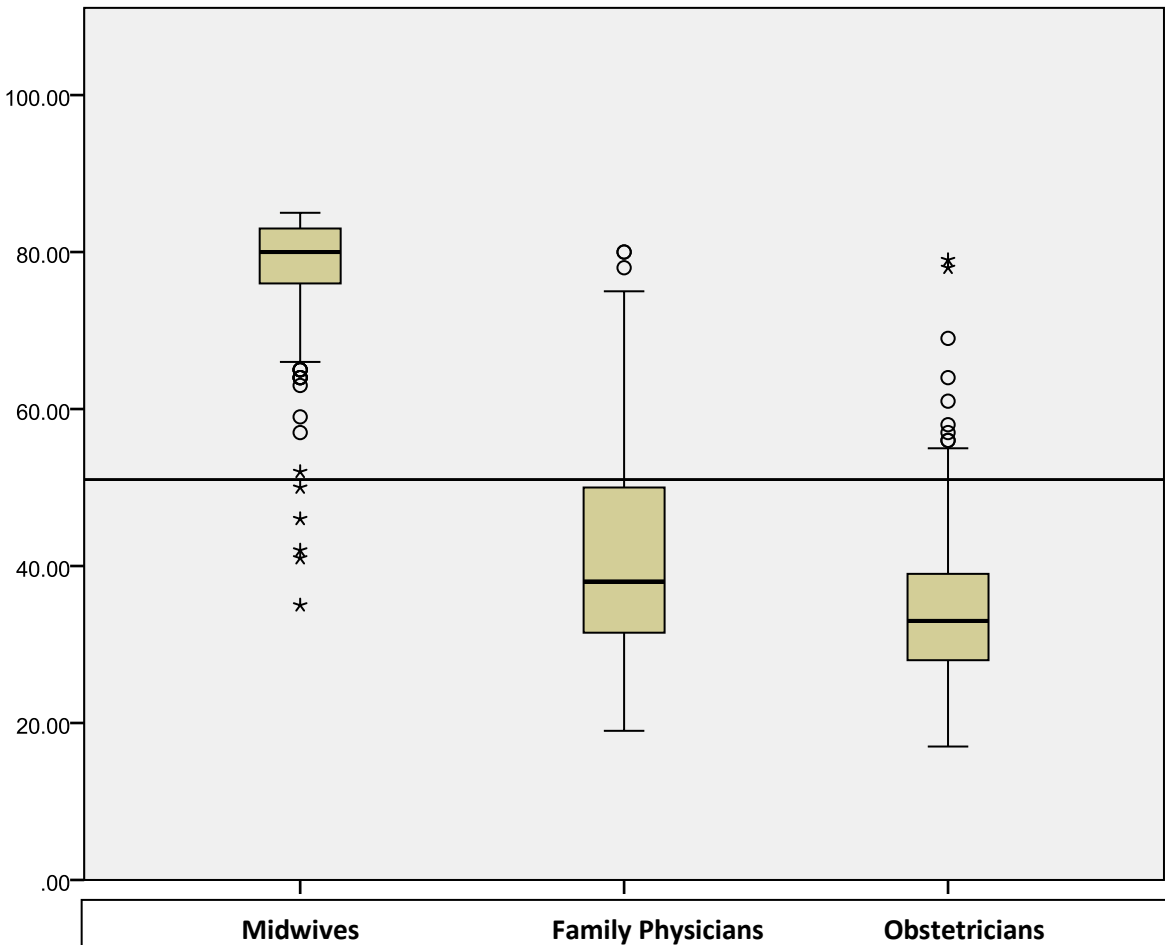

Supplement: MOESM1 [file 9459208]
